# Supplementary material
Source: publisher site journal article supplement (http://www.apsnet.org/meetings/mtngwshops/NPDRS/Documents/2006/Appendix2.pdf)
Supplement: Supplementary file 1 [file Appendix2.pdf]

## Wheat Rusts

The group reviewing the recovery plan for Wheat Rusts has proposed the following corrections and or changes to the plan:

1. What specific corrections or recommendations are suggested for this recovery plan?
  - Include effects of the environment on disease
  - Better state the need and opportunity to Increase seed and distribution of resistant lines (who, what, where?).
  - Need better modeling for fungicide applications
  - Include threatening races already found in North America
  - Create an adaptive/validated risk assessment model/process for this industry/issue that includes spatial orientation
  
2. What research is needed to more fully complete the current plans? Are the stated research priorities acceptable?
  - No criticism of the specific research priorities in the plan
  - Some discomfort with prioritization per se
  - Consider emphasizing the process and infrastructure more than specific research priorities
  - Make sure research priorities align with stakeholder and customer priorities (i.e., look at in relation to other diseases of concern)
  - Include organization chart of who the players are (to include groups such as millers, bakers, seed companies, land grant universities, ARS, etc.) and make sure they have buy-in.
  
4. What research and information would be required to streamline the development of effective recovery plans for threatening and emerging pathogens?
  - Communicate with invasive species issues but do not merge infrastructures
